# Supplementary material for: Impacts of climate variability and adaptation strategies on crop yields and soil organic carbon in the US Midwest
Source: PubMed Central journal article supplement (PMC6986752; doi:10.1371/journal.pone.0225433), 2020-01-28

Treatment □ CT □ NT

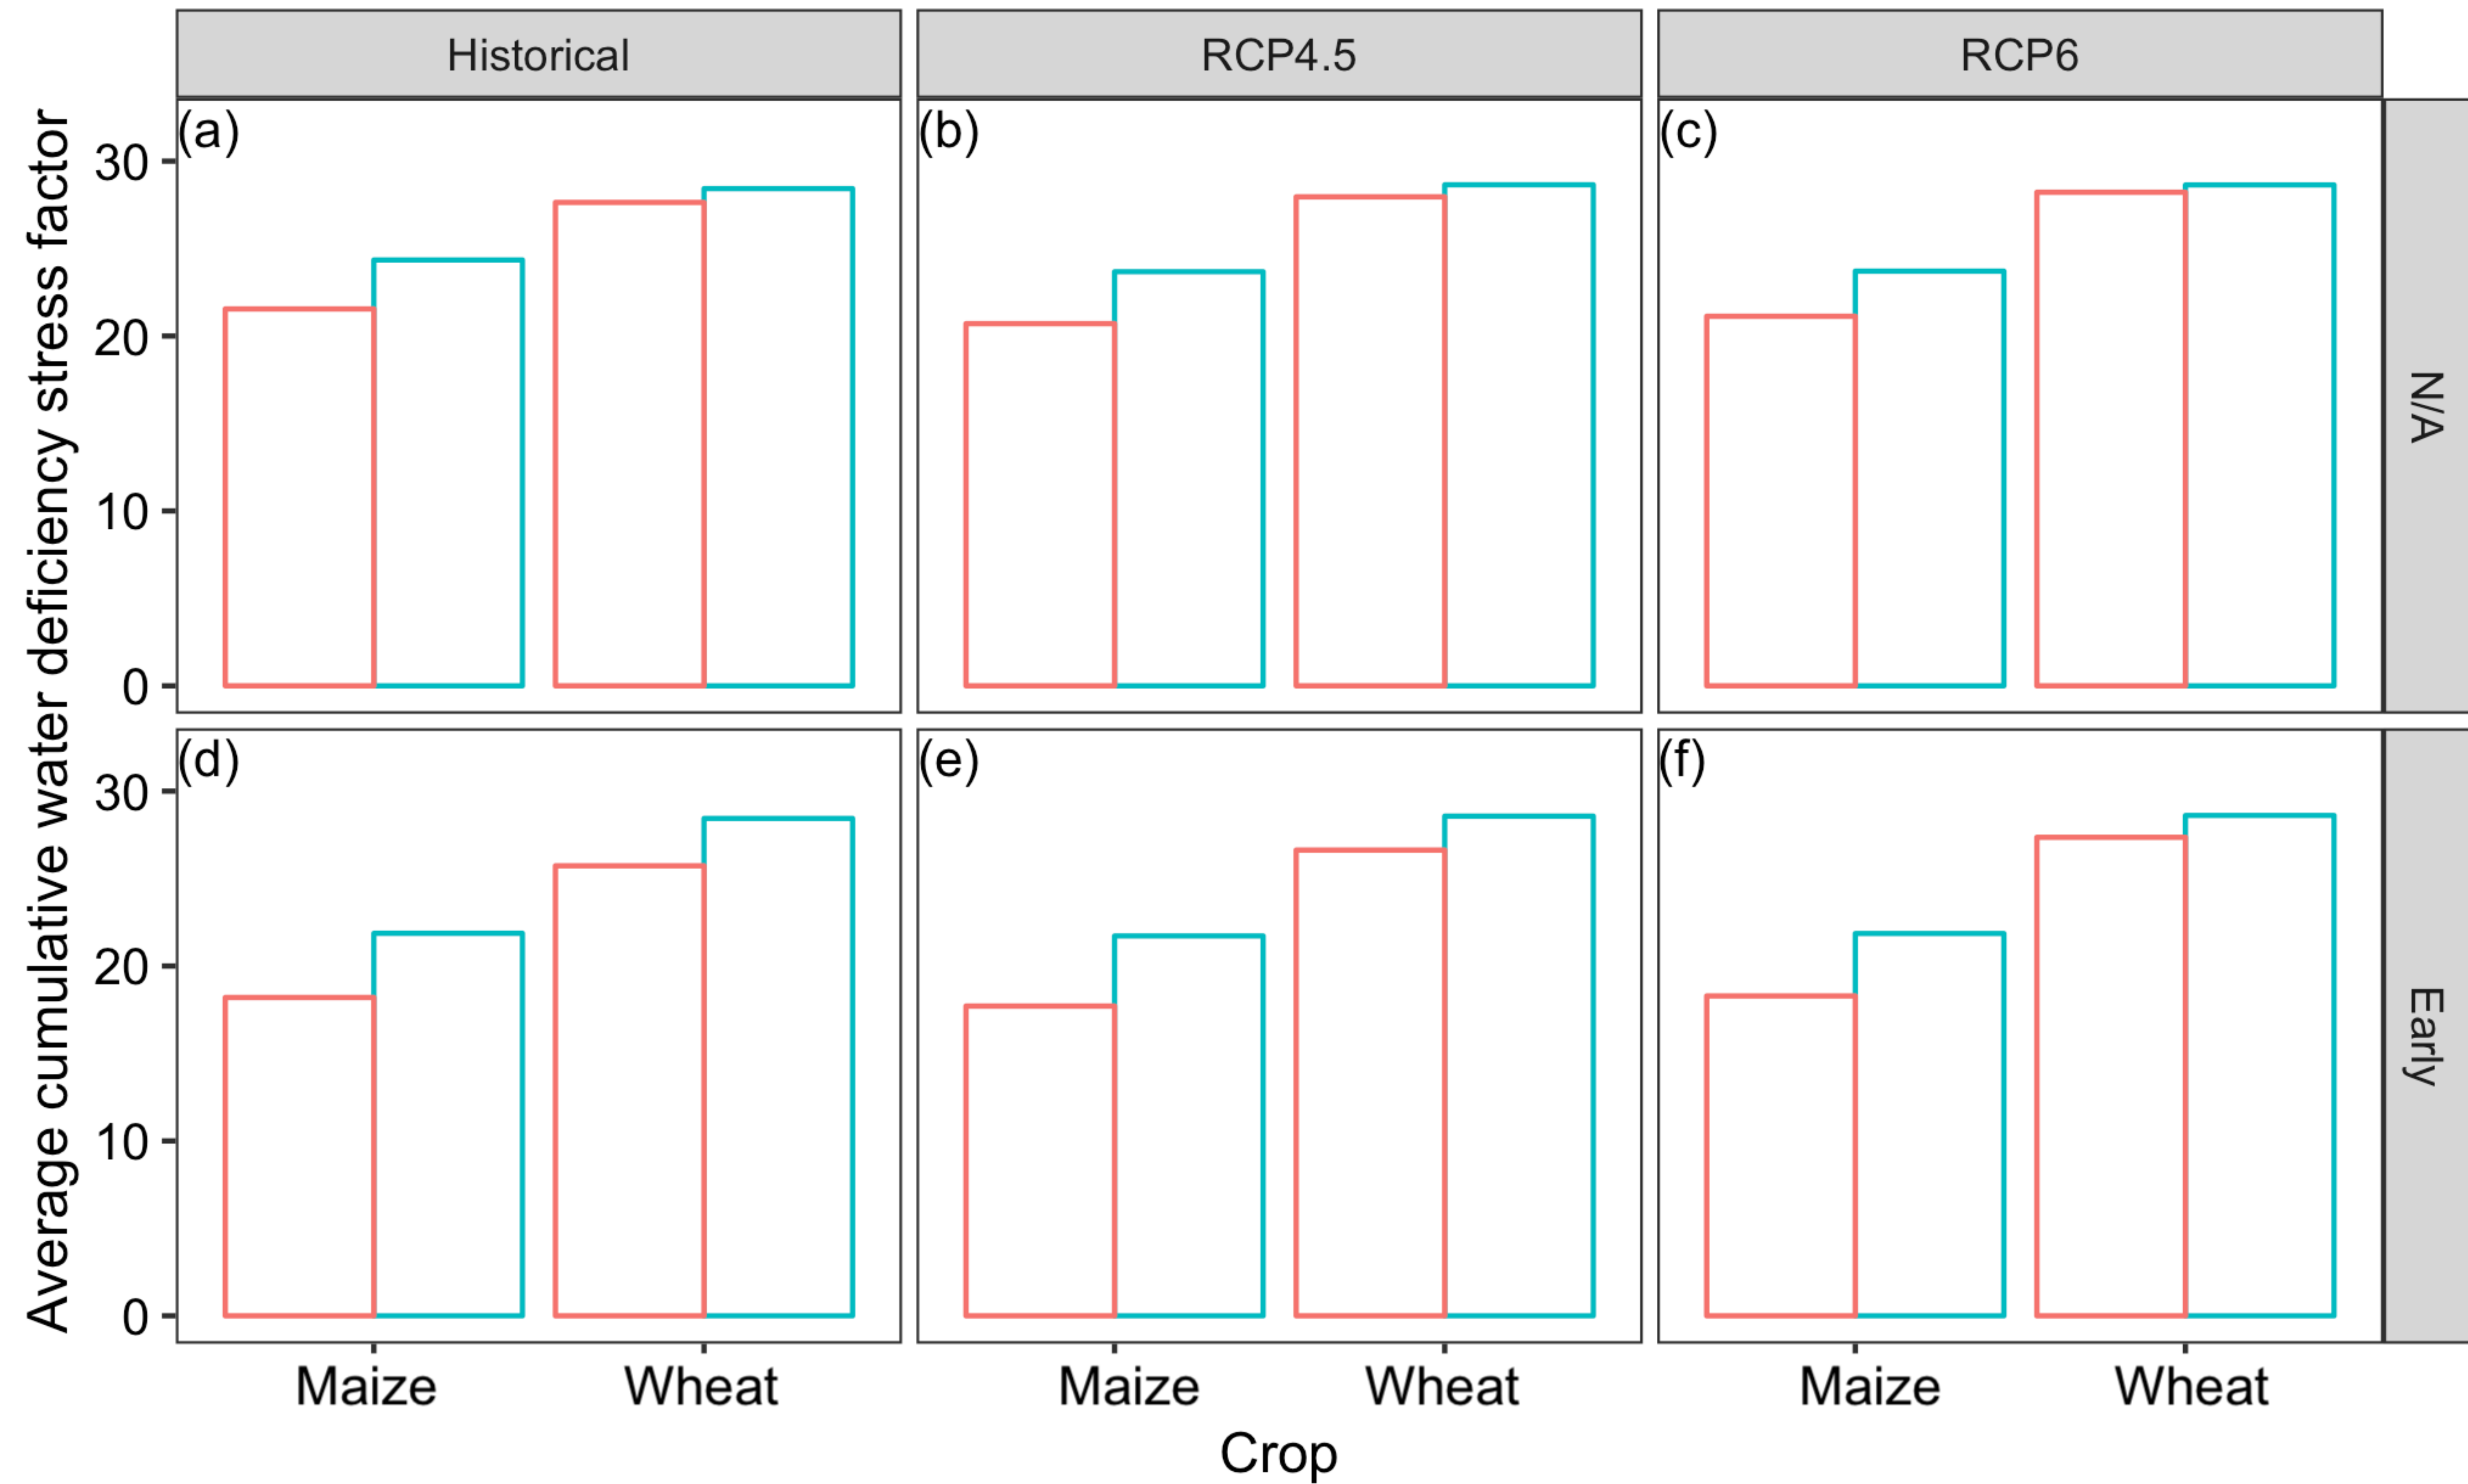

Supplement: pone.0225433.s008.pdf [file pone.0225433.s008.pdf]
